# Supplementary material
Source: Springer Nature journal article supplement (https://www.springermedizin.de/resource/supplementary/12974_2011_381_MOESM5_ESM.pdf/9601534)

**MT-**

**MT+**

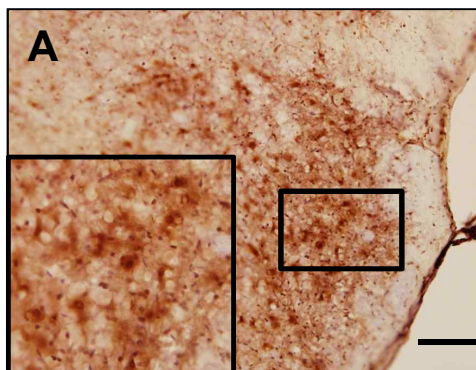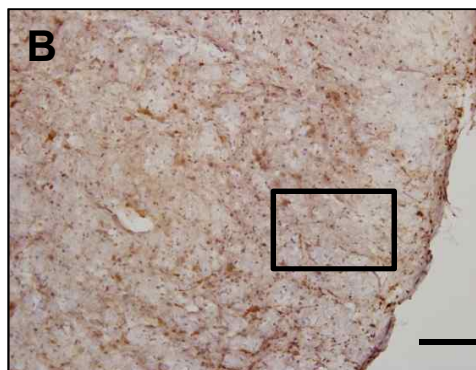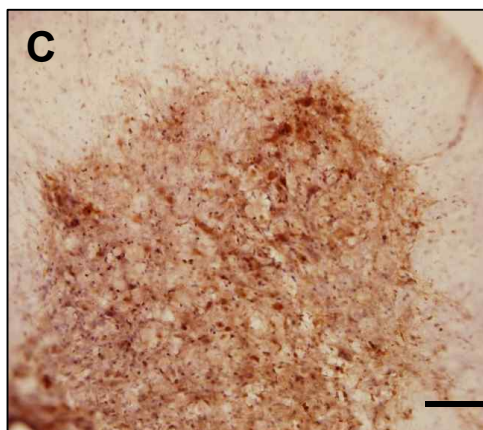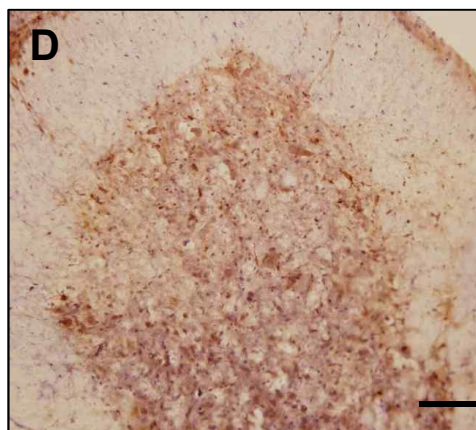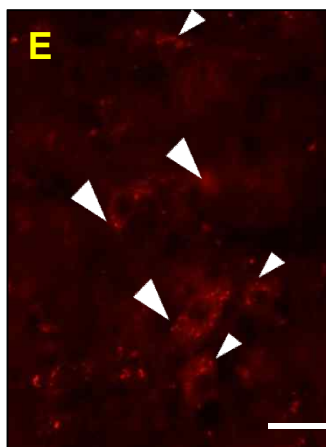

**a-syn**

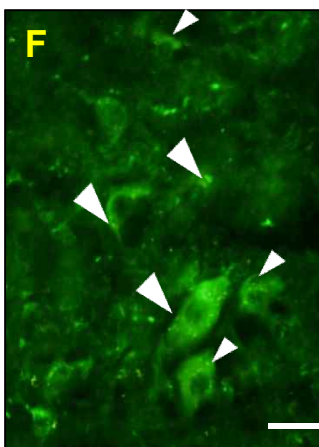

**ubiquitin**

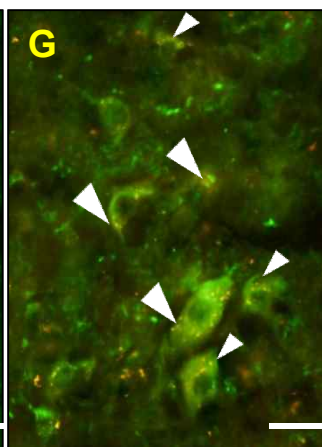

**Merge**

Supplement: MOESM5 [file 9601534]
